# Supplementary material for: Structure and dynamics of a nanodisc by integrating NMR, SAXS and SANS experiments with molecular dynamics simulations
Source: eLife journal article supplement (doi:10.7554/elife.56518), 2020-07-30
Supplement: supp [file elife_poa_e56518_Figure_1_figure_supplement_2.pdf › elife_poa_e56518_Figure_1_figure_supplement_2.pdf]

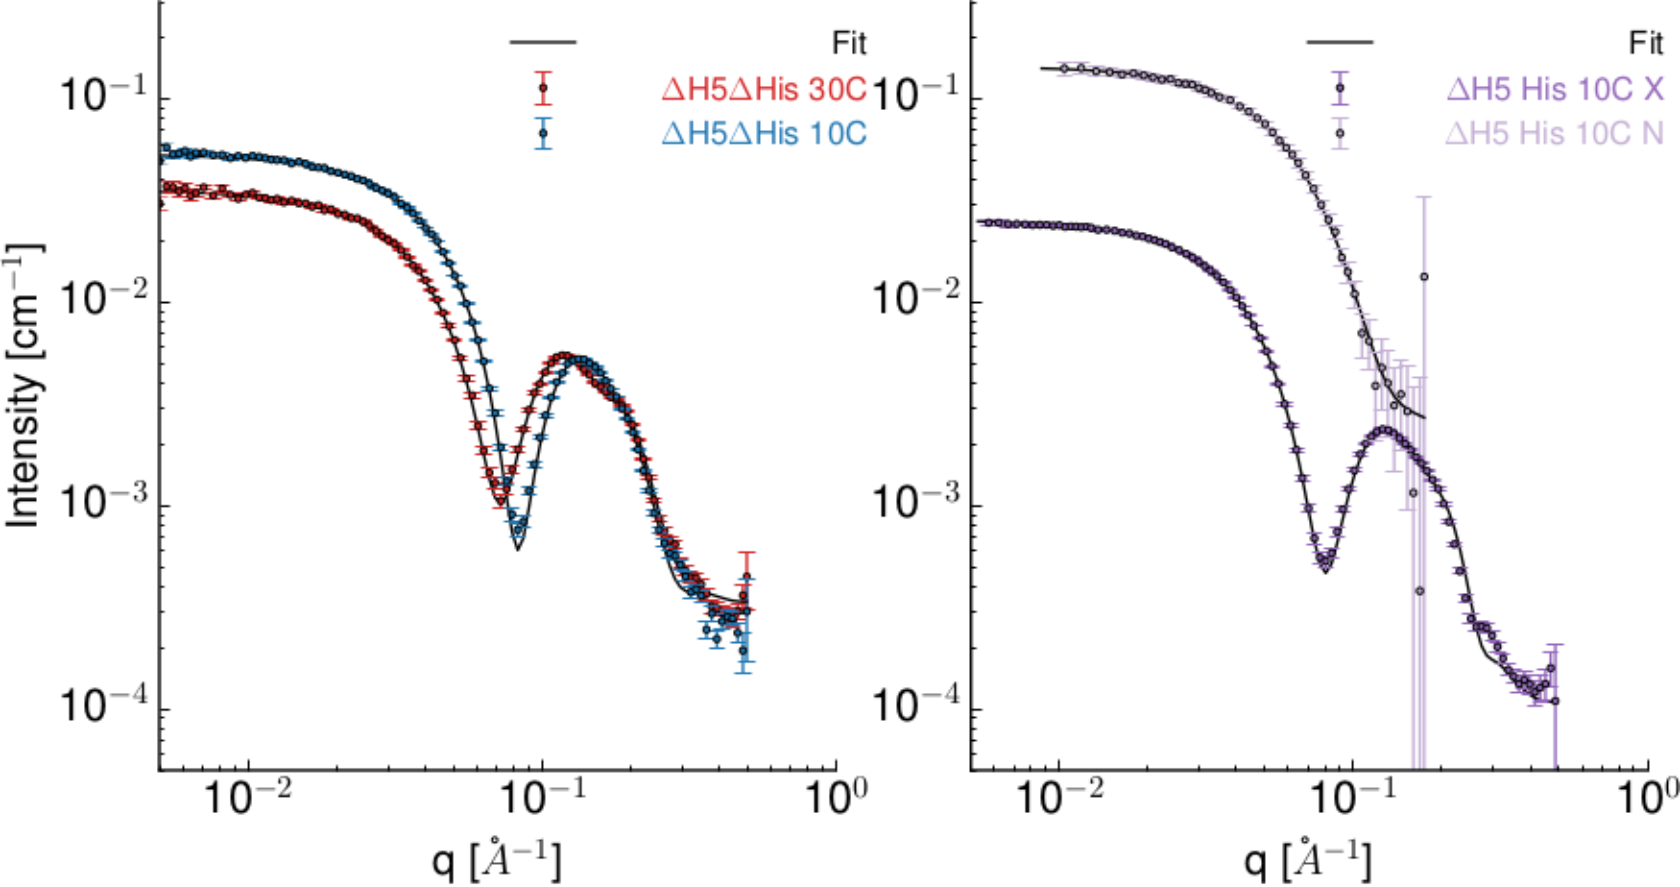

|                                 | Static<br>$\Delta\text{H5}\Delta\text{His 30C}$ | Static<br>$\Delta\text{H5}\Delta\text{His 10C}$ | SEC-SAS<br>$\Delta\text{H5 His 10C}$ |
|---------------------------------|-------------------------------------------------|-------------------------------------------------|--------------------------------------|
| $\chi^2_{\text{reduced}}$       | 2.40                                            | 3.76                                            | 1.95                                 |
| <b>Fitting Parameters</b>       |                                                 |                                                 |                                      |
| Axis Ratio                      | $1.3 \pm 0.1$                                   | $1.4 \pm 0.1$                                   | $1.3 \pm 0.4$                        |
| $A_{\text{Head}}$               | $60 \pm 3 \text{ \AA}^2$                        | $52 \pm 2$                                      | $55 \pm 5$                           |
| $H_{\text{Belt}}$               | $24^* \text{ \AA}^2$                            | $24^* \text{ \AA}^2$                            | $24^* \text{ \AA}^2$                 |
| $N_{\text{Lipid}}$              | $104 \pm 9$                                     | $102 \pm 7$                                     | $65 \pm 13$                          |
| $\text{CV}_{\text{belt}}$       | $0.97 \pm 0.02$                                 | 1*                                              | 1*                                   |
| $\text{CV}_{\text{lipid}}$      | $1.044 \pm 0.007$                               | $1.003 \pm 0.007$                               | $1 \pm 0.02$                         |
| $\text{Back}_{\text{neutron}}$  | $0 \pm 0$                                       | $0 \pm 0$                                       | $-0.0036 \pm 0.006$                  |
| $\text{Scale}_{x\text{-ray}}$   | $1.2 \pm 0.2$                                   | $1.2 \pm 0.1$                                   | $1.1 \pm 0.3$                        |
| $\text{Scale}_{\text{neutron}}$ | -                                               | -                                               | $1.7 \pm 0.5$                        |
| <b>Results From Fits</b>        |                                                 |                                                 |                                      |
| $H_{\text{lipid}}$              | 38 Å                                            | 41 Å                                            | 40 Å                                 |
| $H_{\text{tails}}$              | 26 Å                                            | 29 Å                                            | 28 Å                                 |
| $R_{\text{major}}$              | 36 Å                                            | 34 Å                                            | 27 Å                                 |
| $R_{\text{minor}}$              | 28 Å                                            | 25 Å                                            | 21 Å                                 |
| $W_{\text{belt}}$               | 9 Å                                             | 9 Å                                             | 10 Å                                 |
