# Supplementary material for: Structure and dynamics of a nanodisc by integrating NMR, SAXS and SANS experiments with molecular dynamics simulations
Source: eLife journal article supplement (doi:10.7554/elife.56518), 2020-07-30
Supplement: supp [file elife_poa_e56518_Figure_3_figure_supplement_4.pdf › elife_poa_e56518_Figure_3_figure_supplement_4.pdf]

| Data for integration            | $\theta$ | $S_{rel}$ | $\chi^2$ |            |        |
|---------------------------------|----------|-----------|----------|------------|--------|
|                                 |          |           | SAXS     | Methyl-NOE | HN-NOE |
| PDB                             | -        | 0         | 2.9      | 20.7       | 6.3    |
| MD                              | -        | 0         | 10.0     | 19.5       | 6.2    |
| MD + SAXS                       | 5        | -1.7      | 1.5      | 19.8       | 5.9    |
| MD + Methyl-NOE                 | 4        | -1.3      | 7.5      | 2.1        | 5.7    |
| MD + HN-NOE                     | 3        | -2.0      | 11.1     | 24.0       | 4.1    |
| MD + SAXS + Methyl-NOE          | 6        | -1.7      | 1.9      | 8.2        | 6.3    |
| MD + SAXS + HN-NOE              | 6        | -1.6      | 1.8      | 19.2       | 5.2    |
| MD + Methyl-NOE+ HN-NOE         | 4        | -1.9      | 8.9      | 3.6        | 4.3    |
| MD + SAXS + Methyl-NOE + HN-NOE | 6        | -1.7      | 1.9      | 9.3        | 5.4    |
