# Supplementary figures and images for: Structure and dynamics of a nanodisc by integrating NMR, SAXS and SANS experiments with molecular dynamics simulations
Source: eLife journal article supplement (doi:10.7554/elife.56518), 2020-07-30

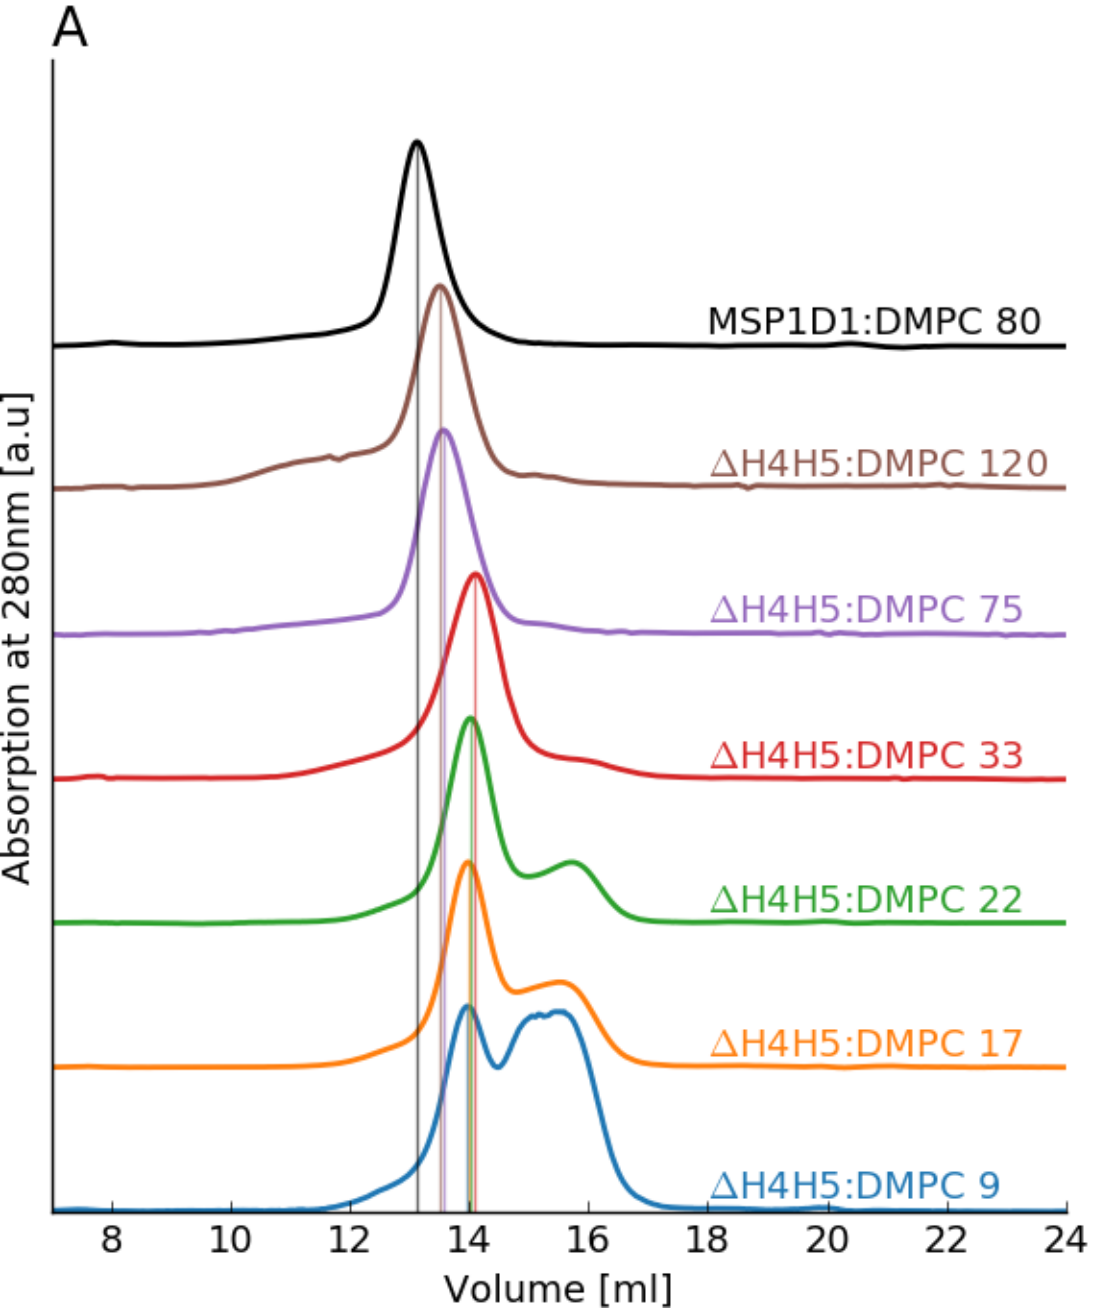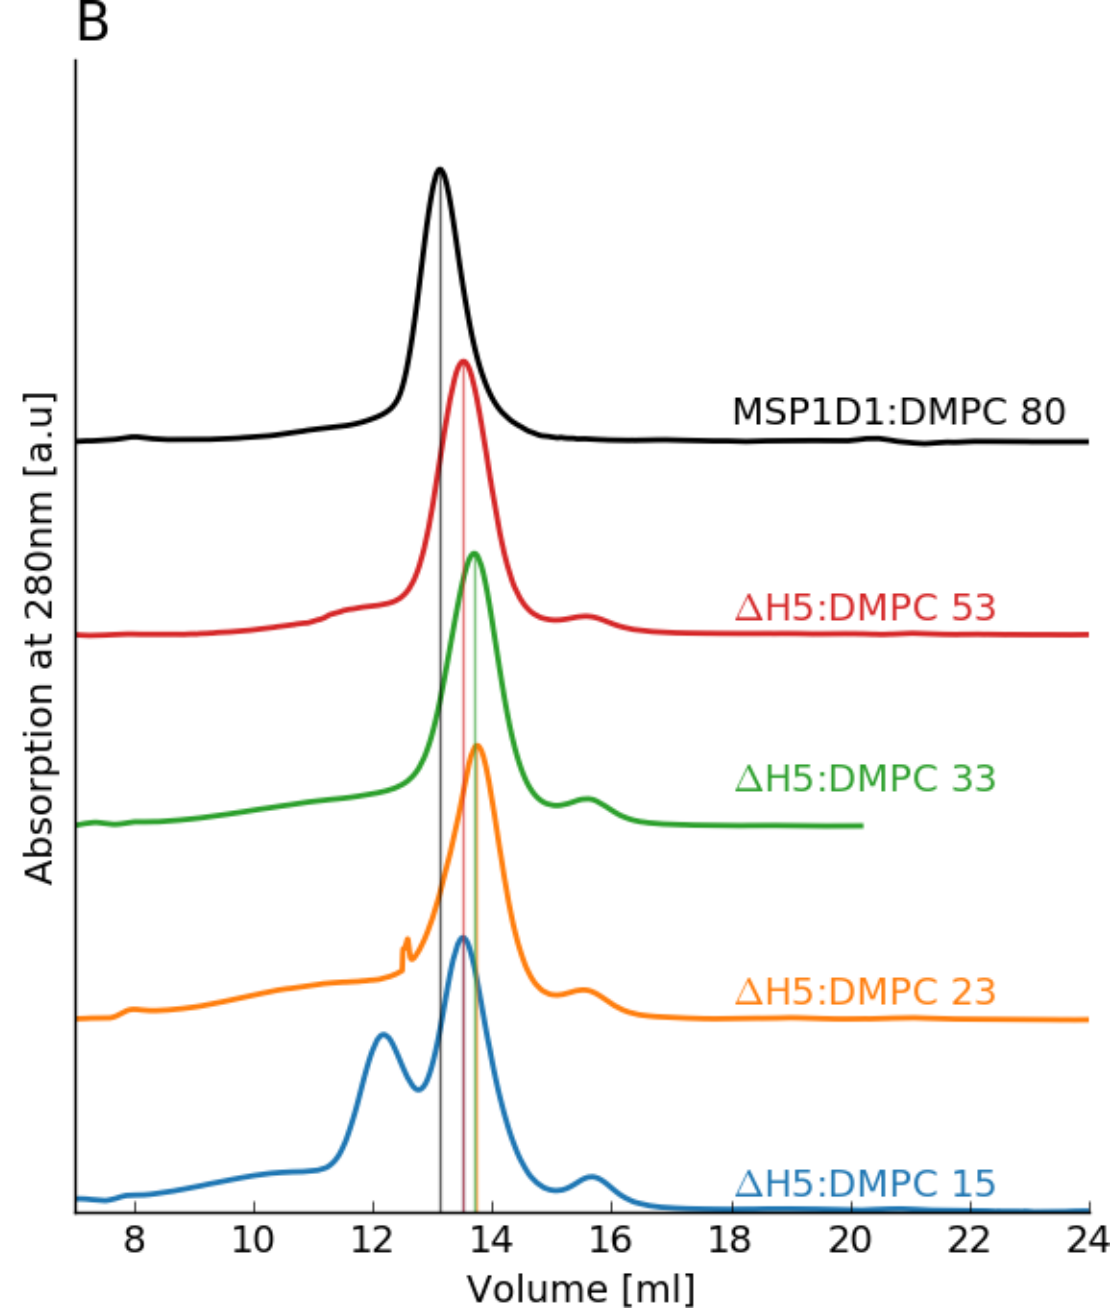

Supplement: supp [file elife_poa_e56518_Figure_1_figure_supplement_1.pdf › elife_poa_e56518_Figure_1_figure_supplement_1.pdf]

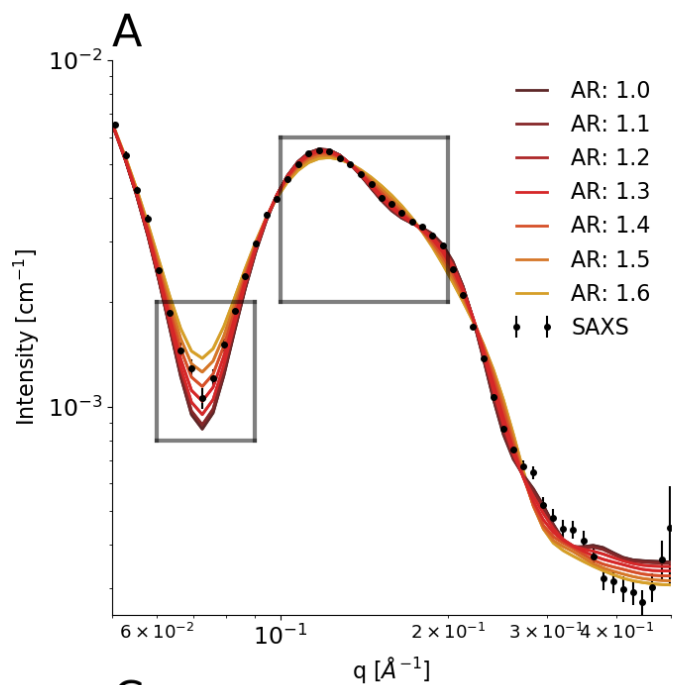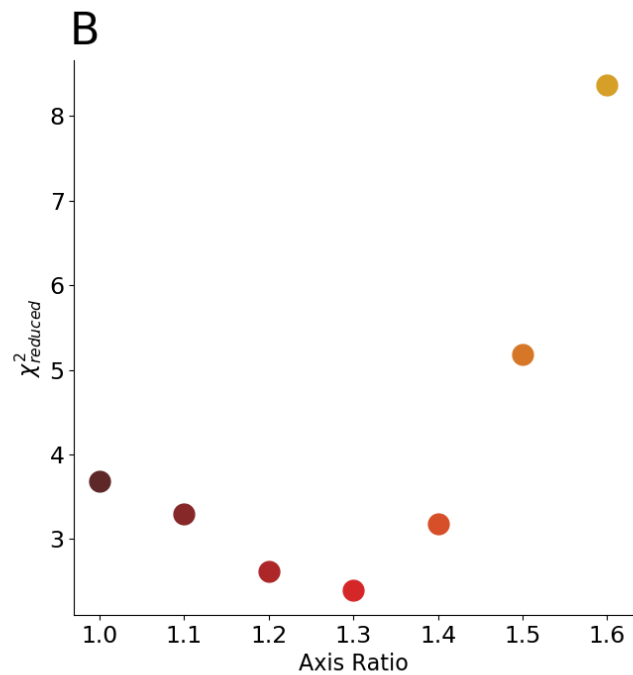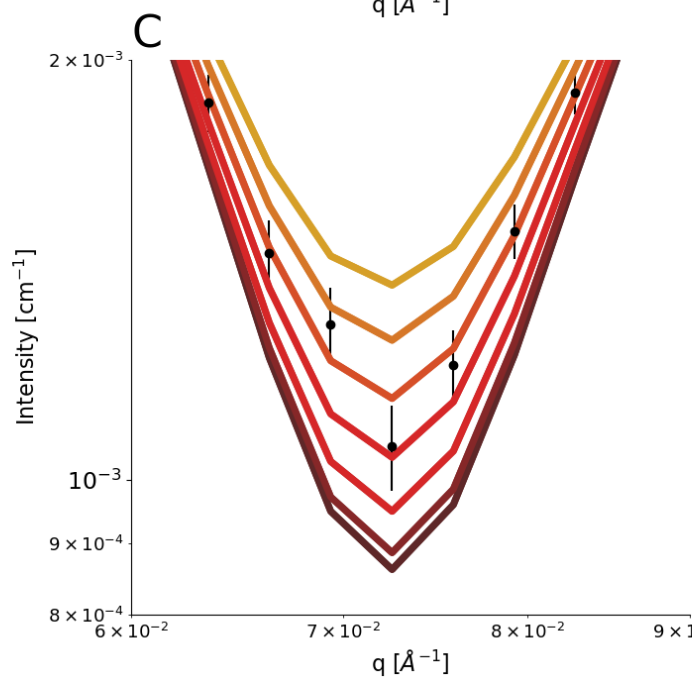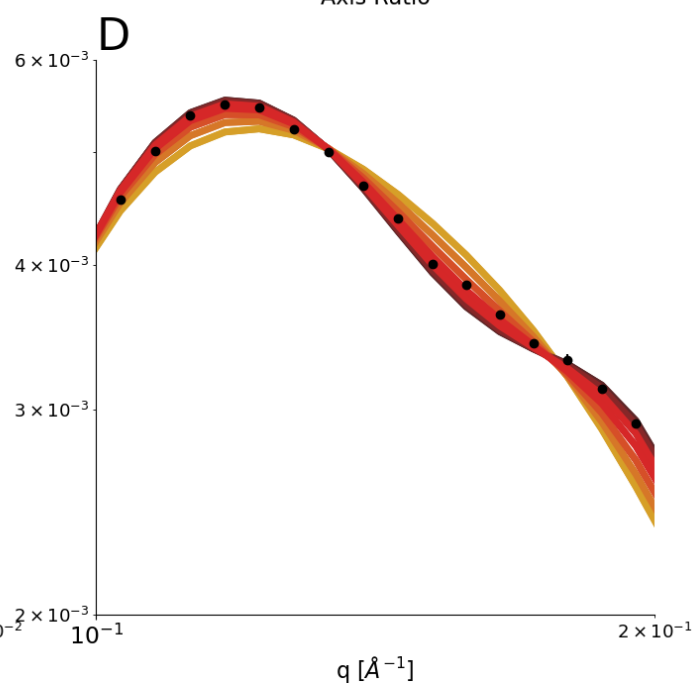

Supplement: supp [file elife_poa_e56518_Figure_1_figure_supplement_3.pdf › elife_poa_e56518_Figure_1_figure_supplement_3.pdf]

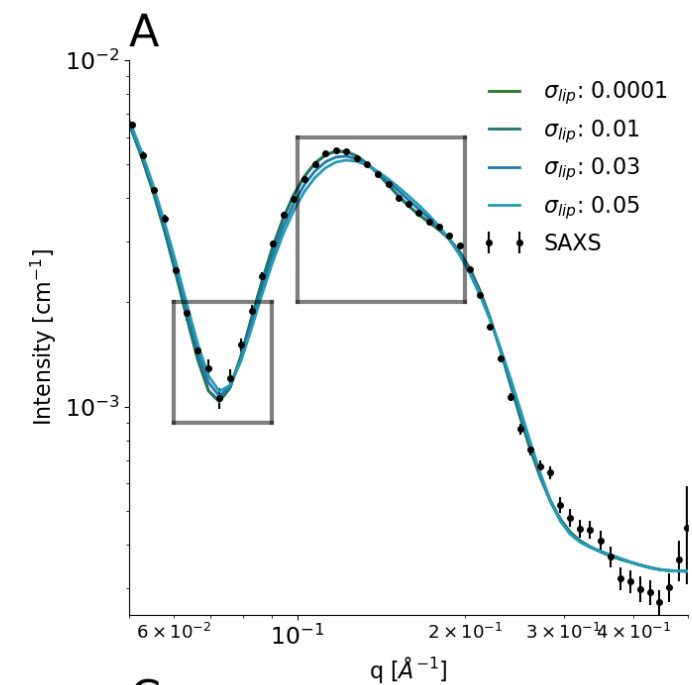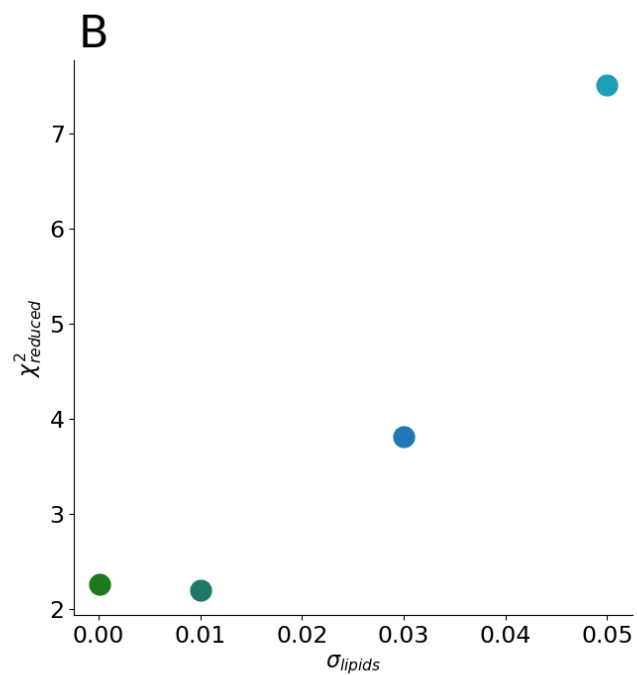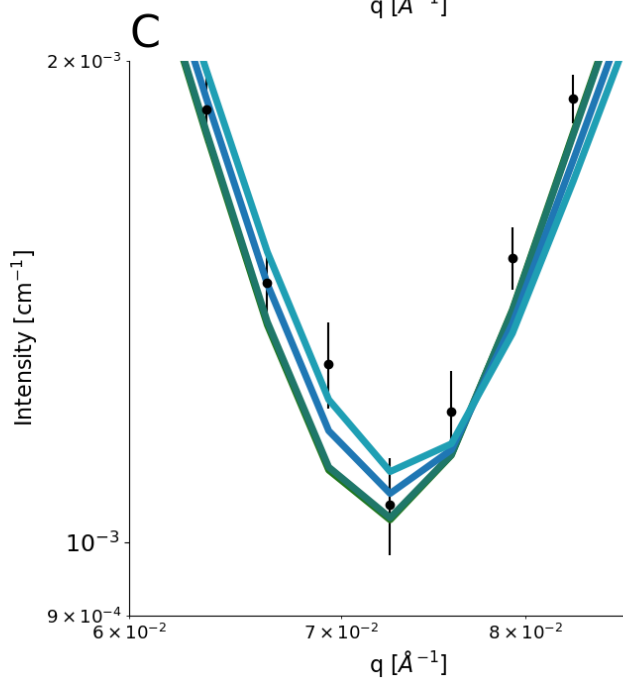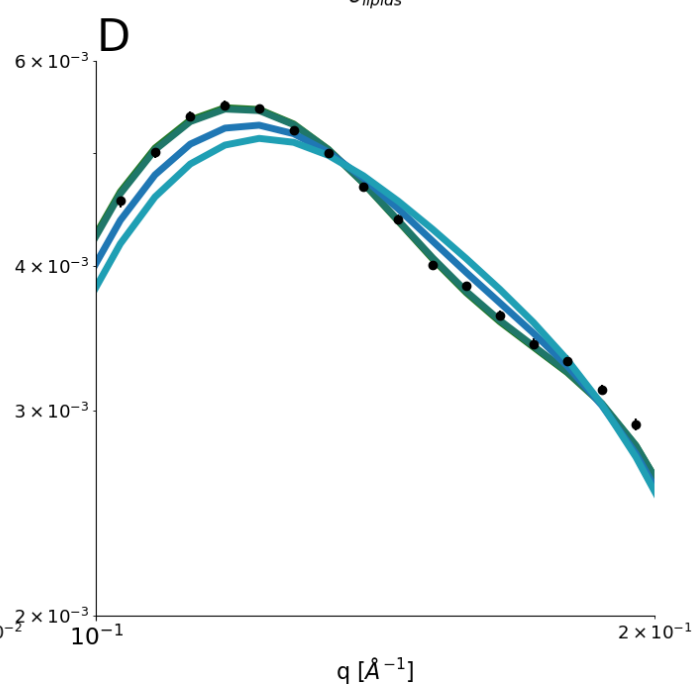

Supplement: supp [file elife_poa_e56518_Figure_1_figure_supplement_4.pdf › elife_poa_e56518_Figure_1_figure_supplement_4.pdf]

SAXS from simulation - FOXS

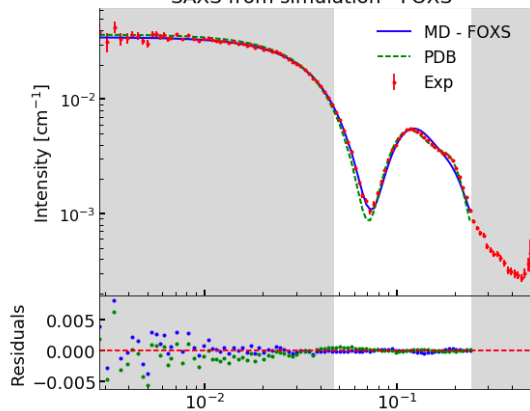

SAXS from simulation - CRYSol

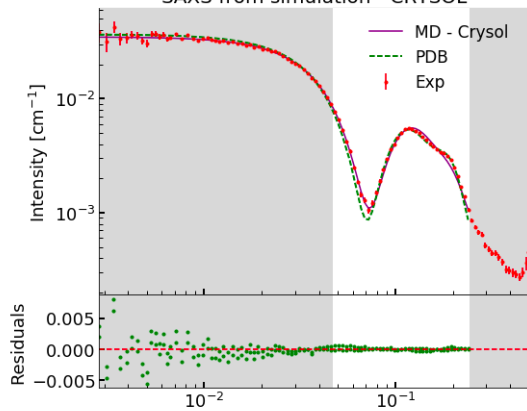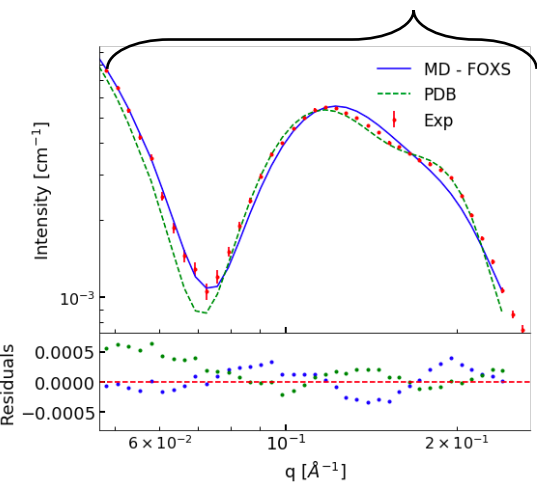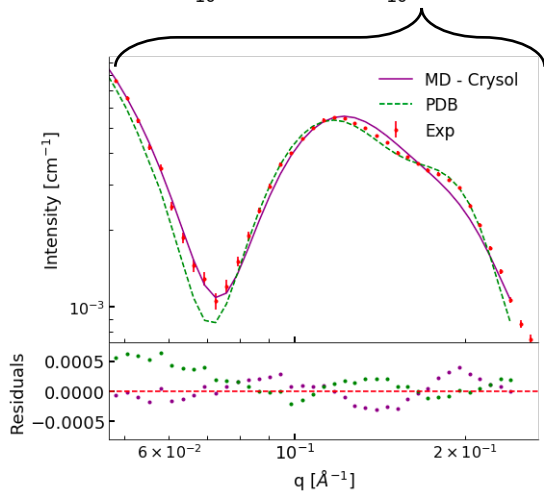

Supplement: supp [file elife_poa_e56518_Figure_2_figure_supplement_1.pdf › elife_poa_e56518_Figure_2_figure_supplement_1.pdf]

# HN 2nd molecule

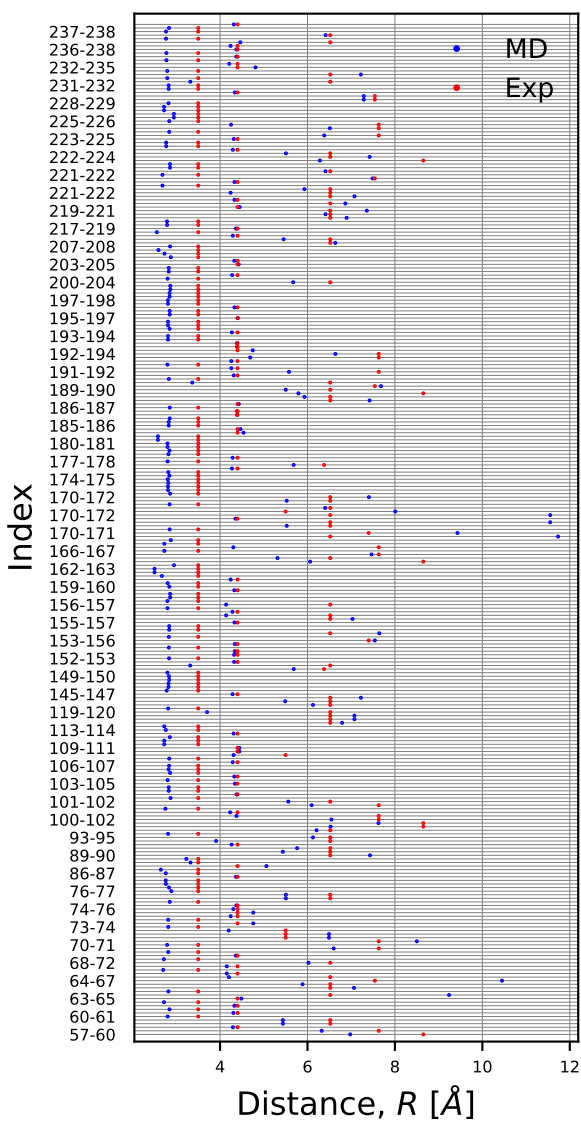

# HN 1st molecule

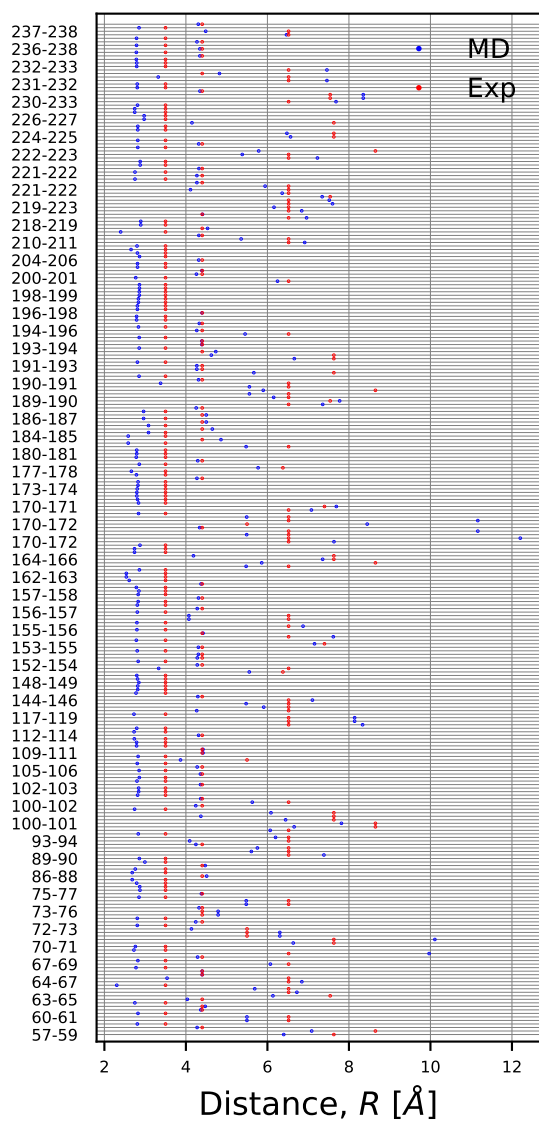

Supplement: supp [file elife_poa_e56518_Figure_2_figure_supplement_2.pdf › elife_poa_e56518_Figure_2_figure_supplement_2.pdf]

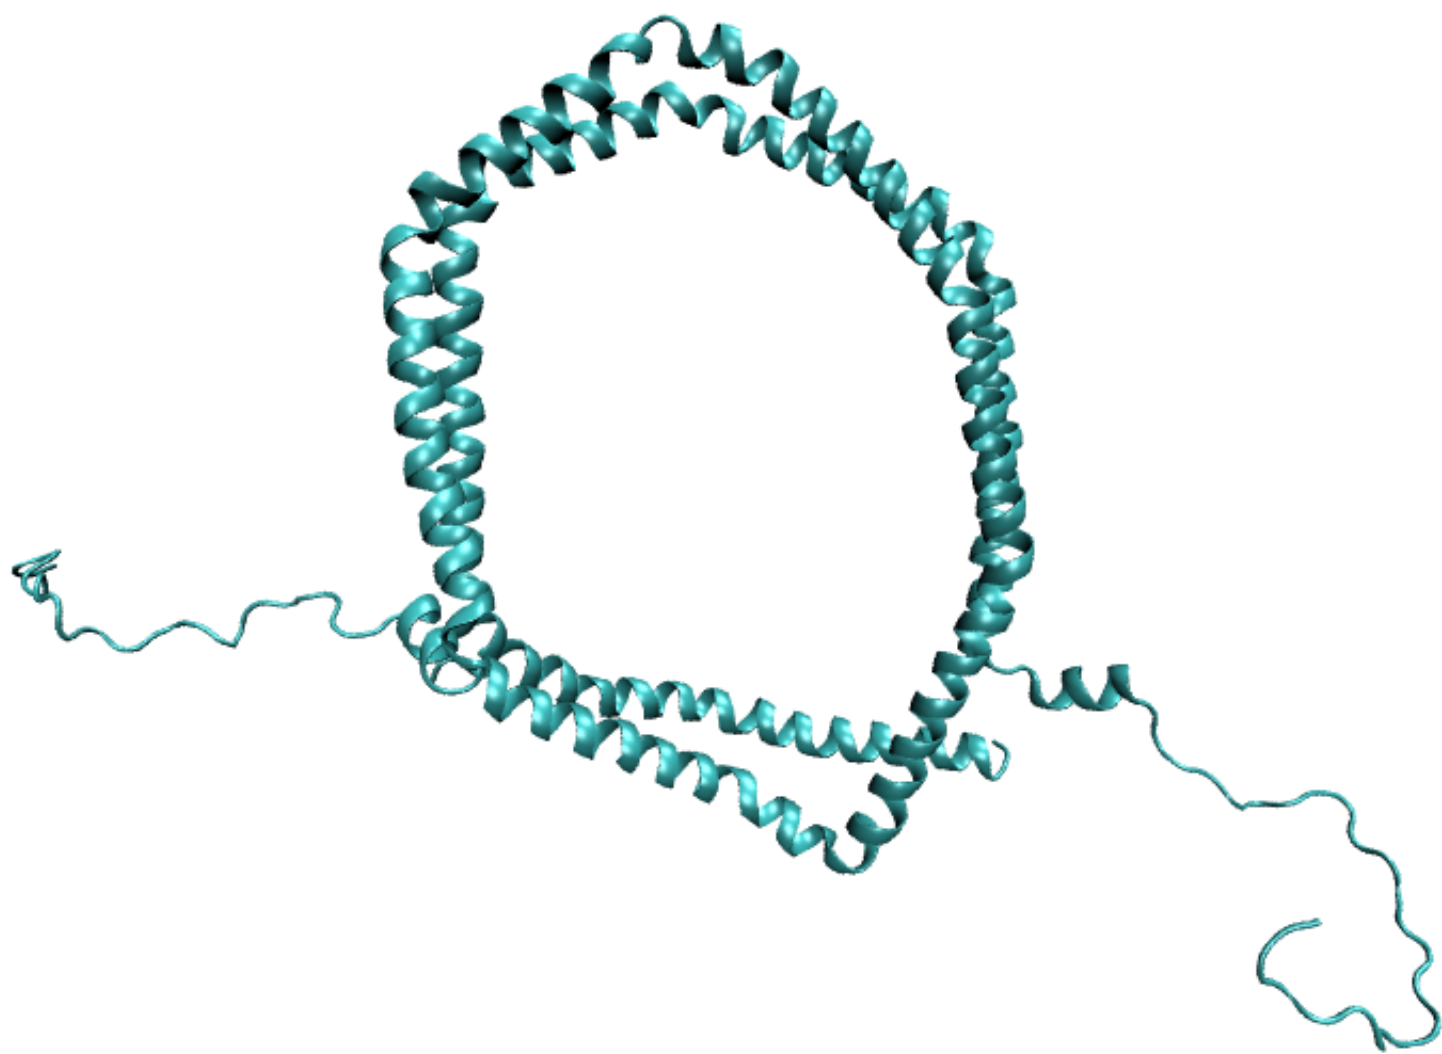

Supplement: supp [file elife_poa_e56518_Figure_2_figure_supplement_3.pdf › elife_poa_e56518_Figure_2_figure_supplement_3.pdf]

# SANS from simulation

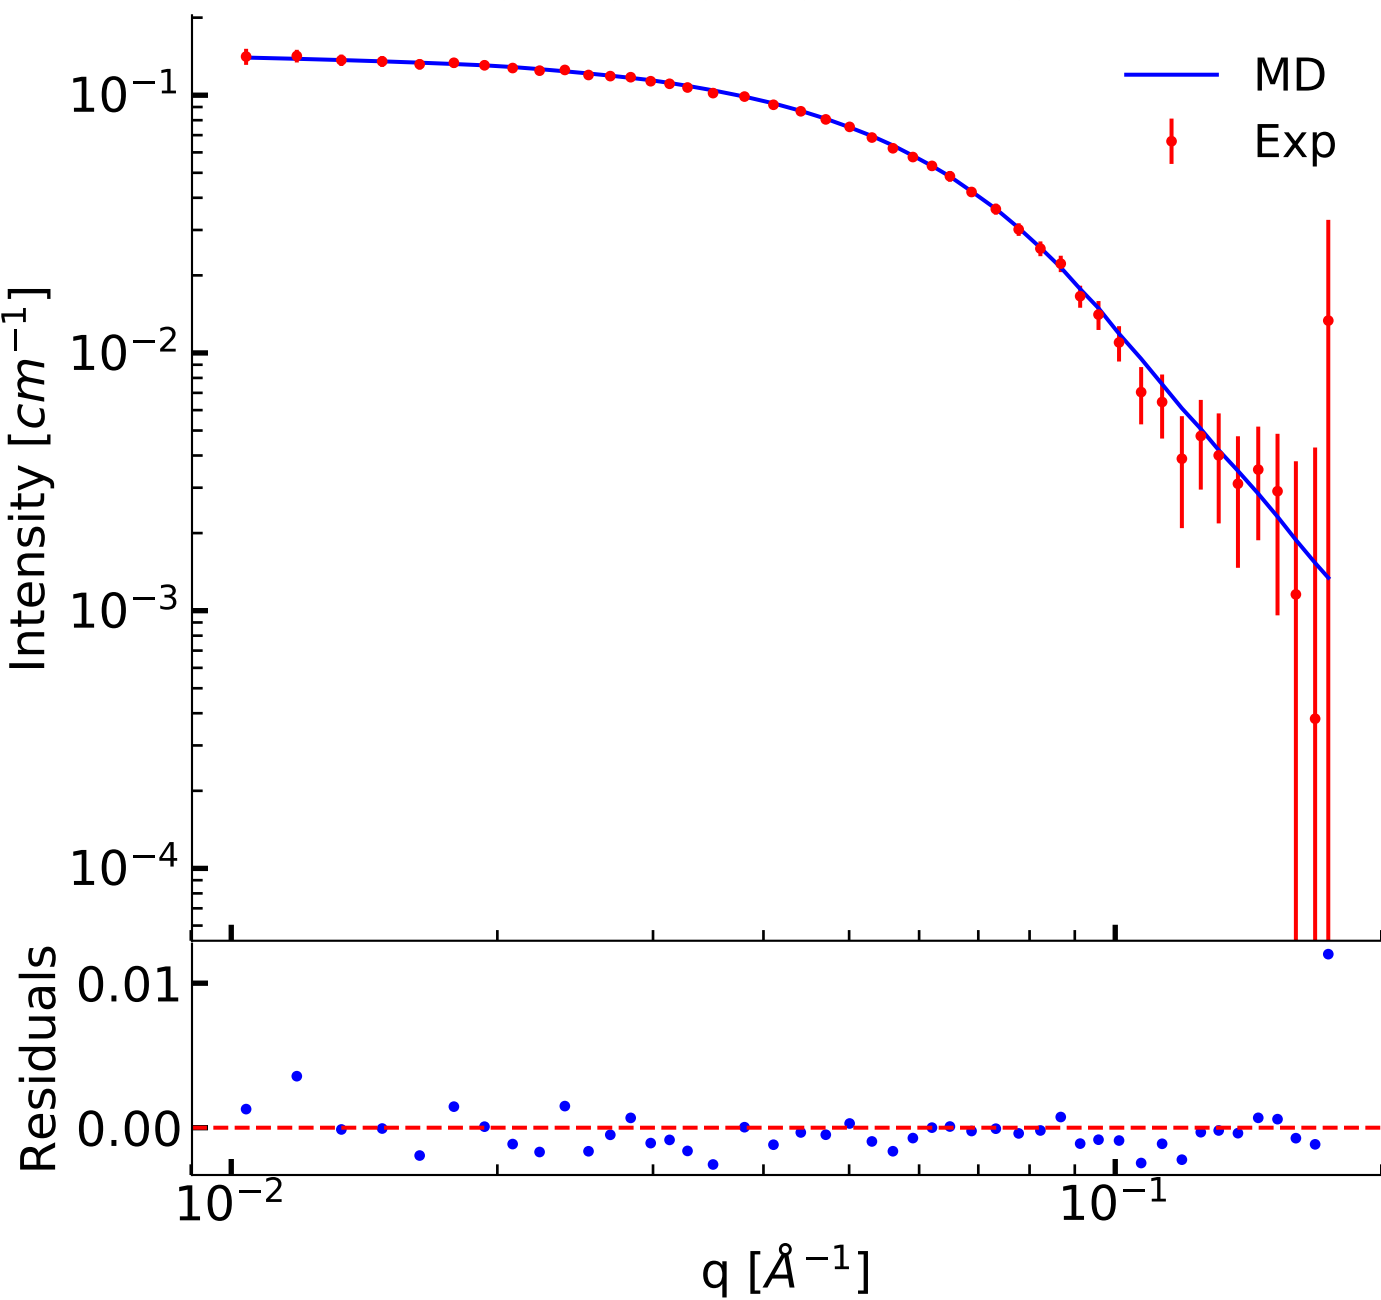

Supplement: supp [file elife_poa_e56518_Figure_2_figure_supplement_4.pdf › elife_poa_e56518_Figure_2_figure_supplement_4.pdf]

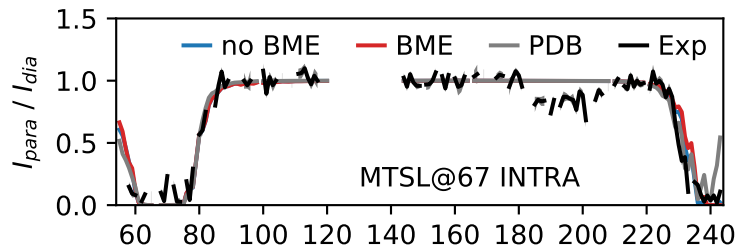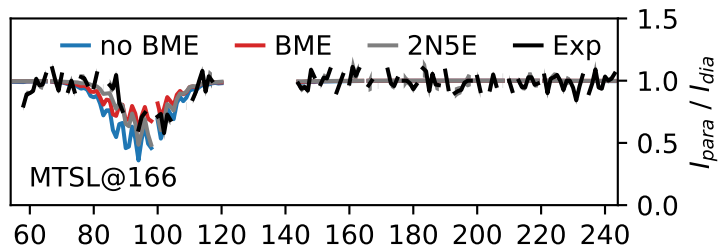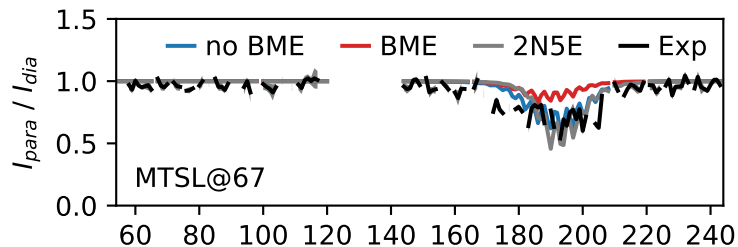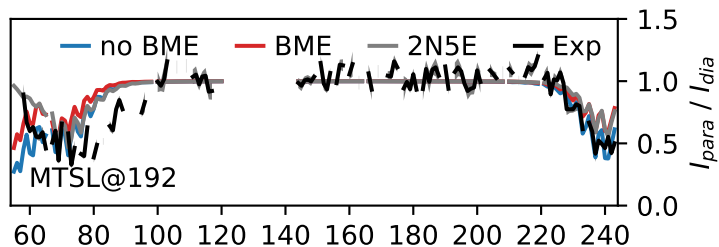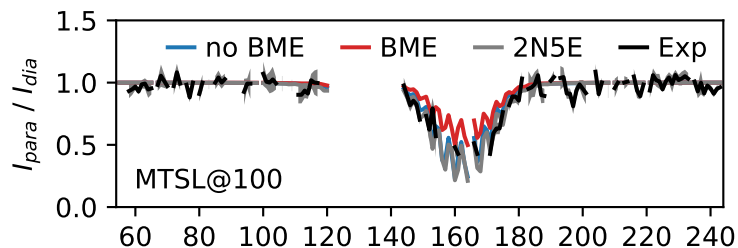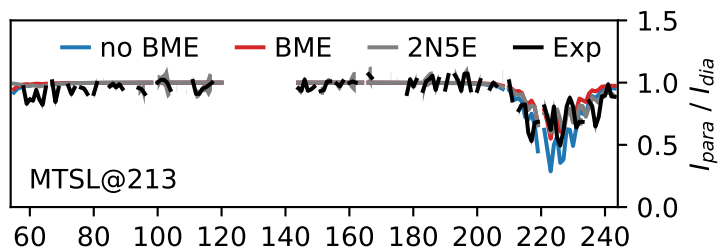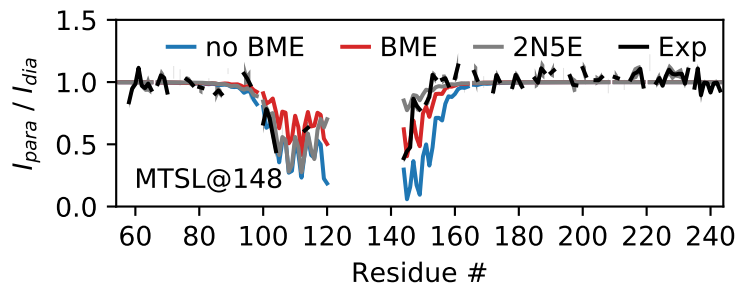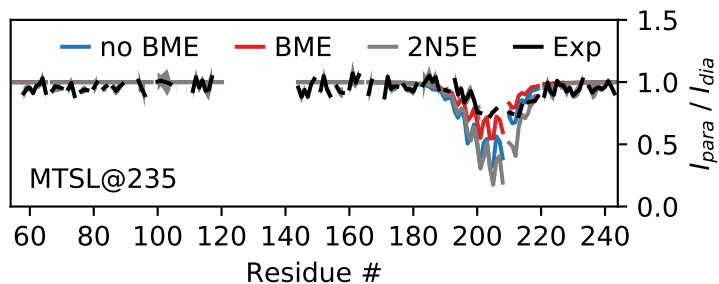

Supplement: supp [file elife_poa_e56518_Figure_2_figure_supplement_5.pdf › elife_poa_e56518_Figure_2_figure_supplement_5.pdf]

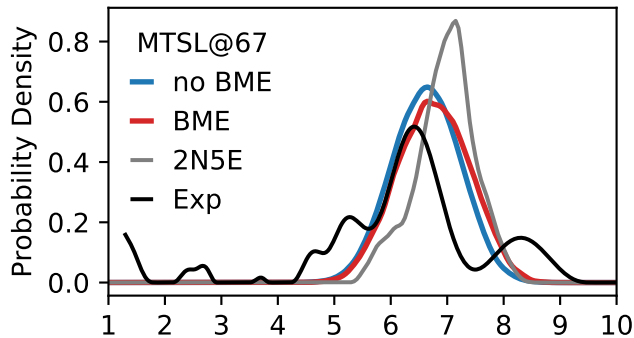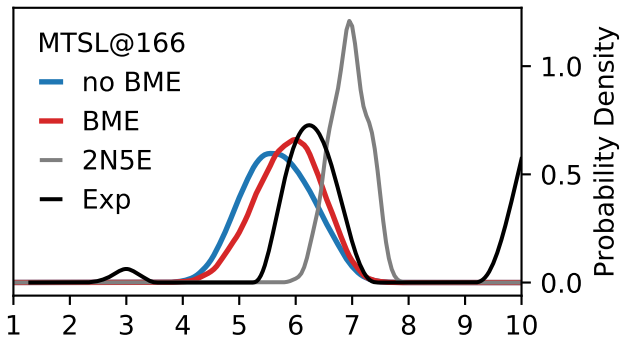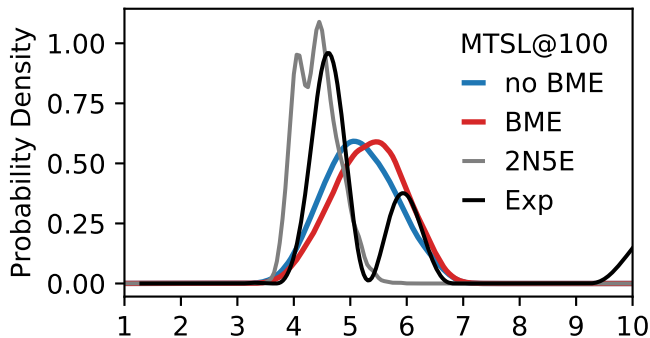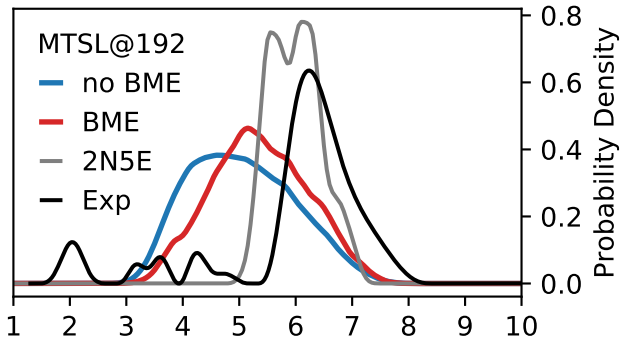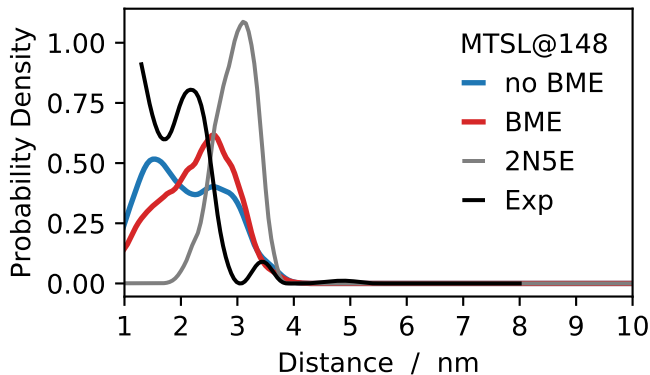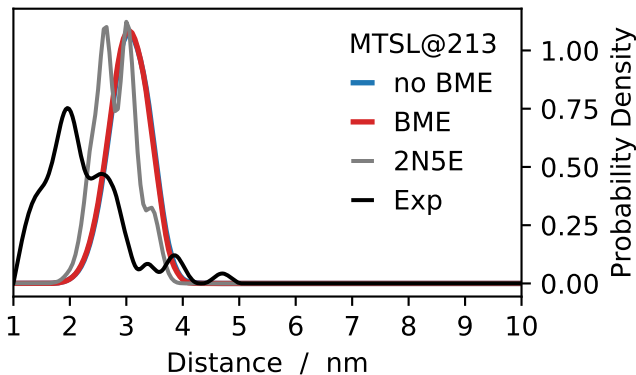

Supplement: supp [file elife_poa_e56518_Figure_2_figure_supplement_6.pdf › elife_poa_e56518_Figure_2_figure_supplement_6.pdf]

# SAXS from simulation - integration

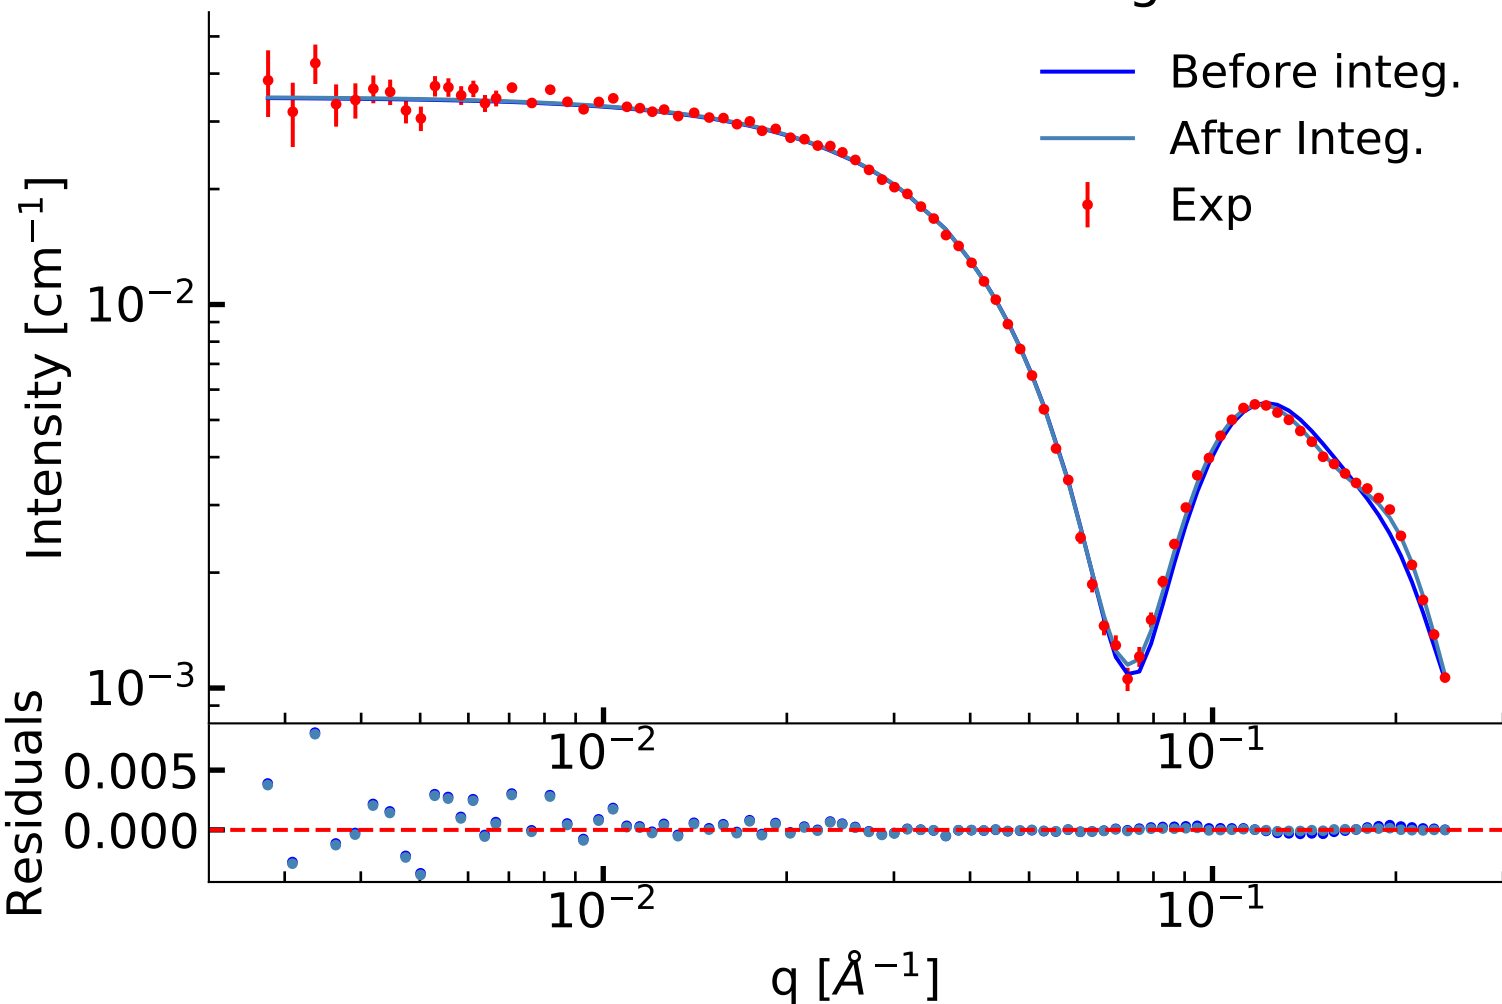

Supplement: supp [file elife_poa_e56518_Figure_3_figure_supplement_1.pdf › elife_poa_e56518_Figure_3_figure_supplement_1.pdf]

# NOE from simulation - integration

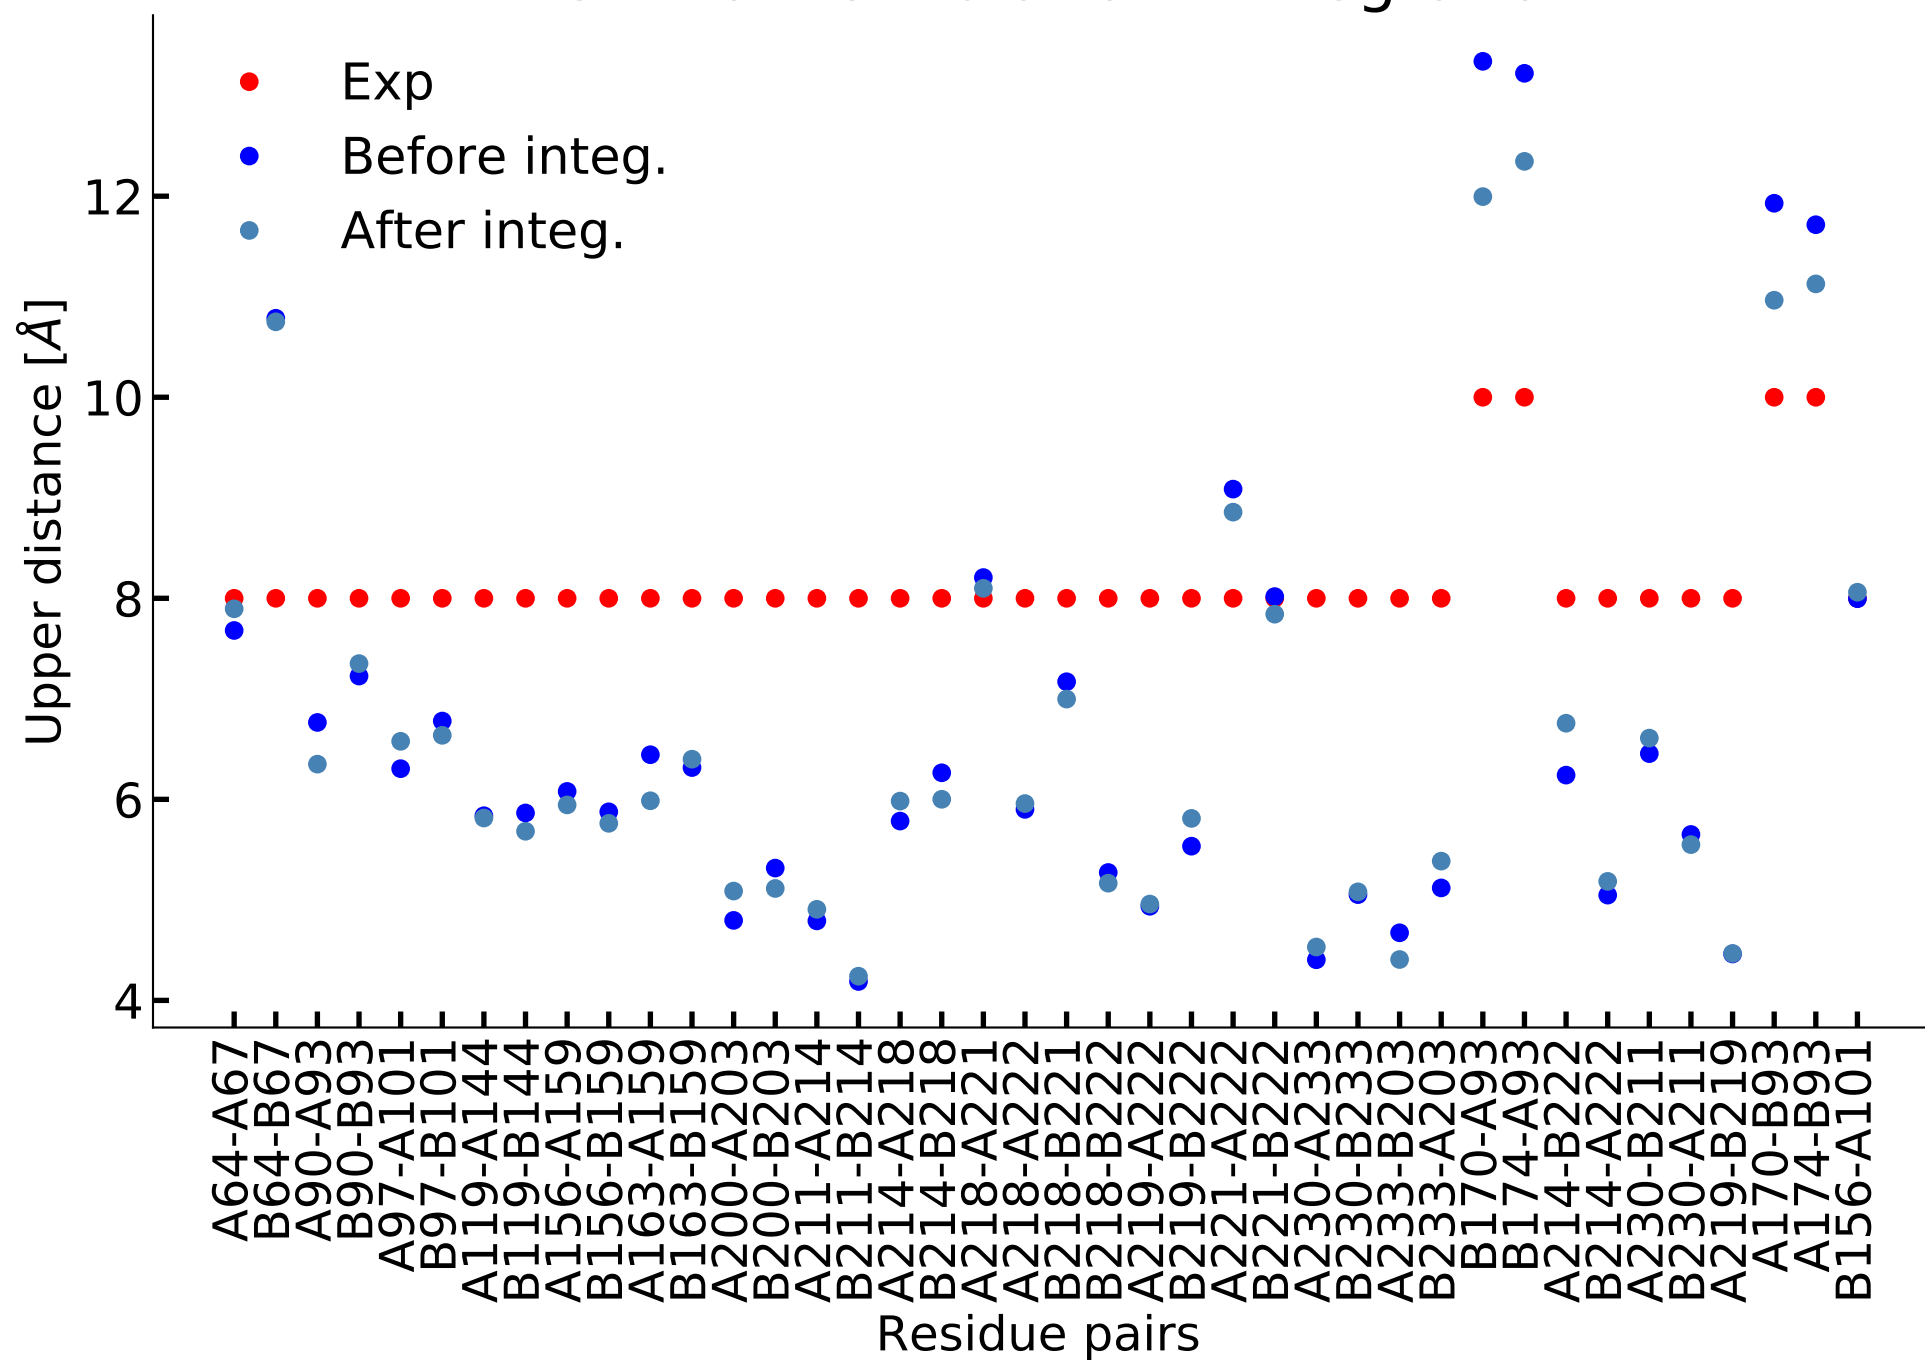

Supplement: supp [file elife_poa_e56518_Figure_3_figure_supplement_2.pdf › elife_poa_e56518_Figure_3_figure_supplement_2.pdf]

SAXS

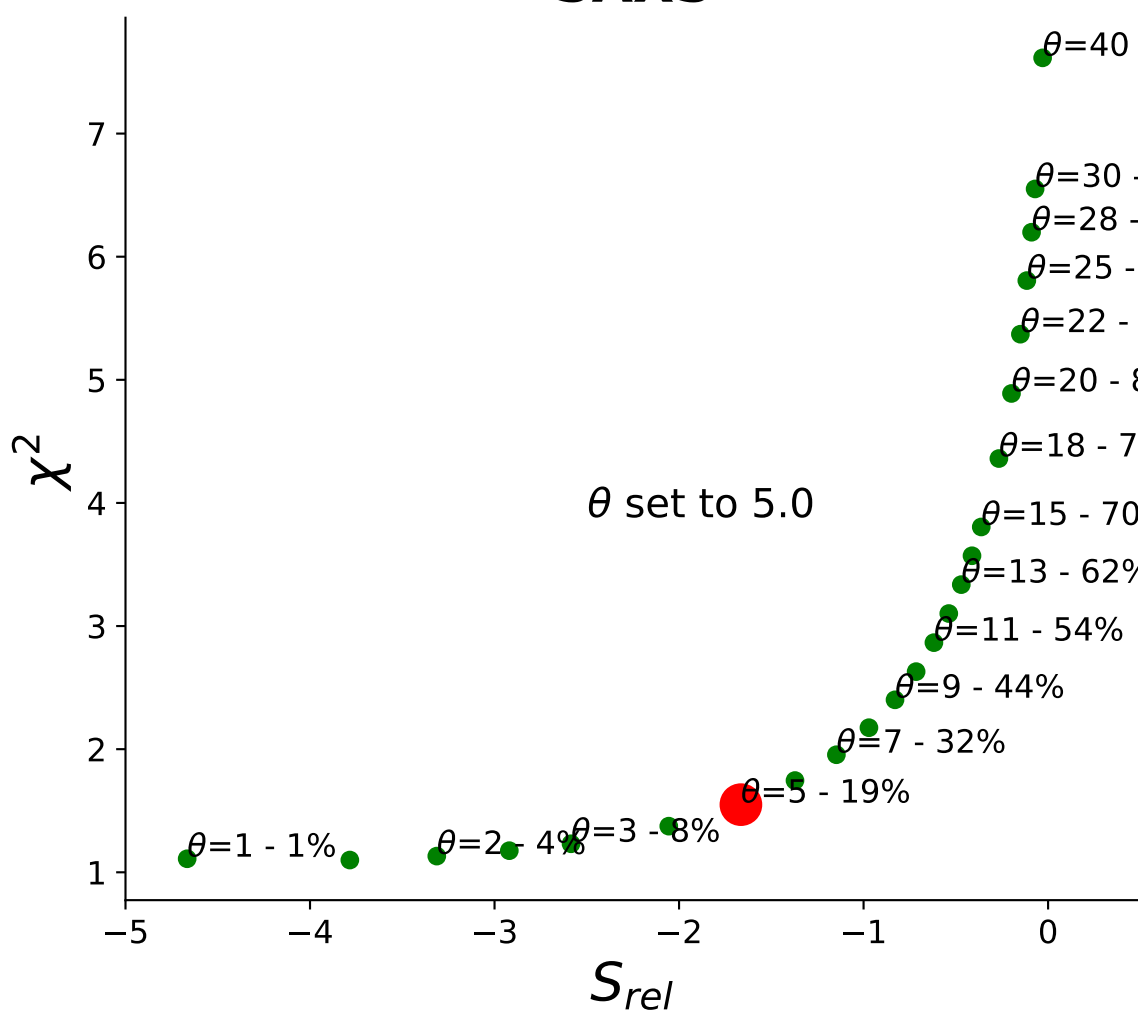

Methyl NOE

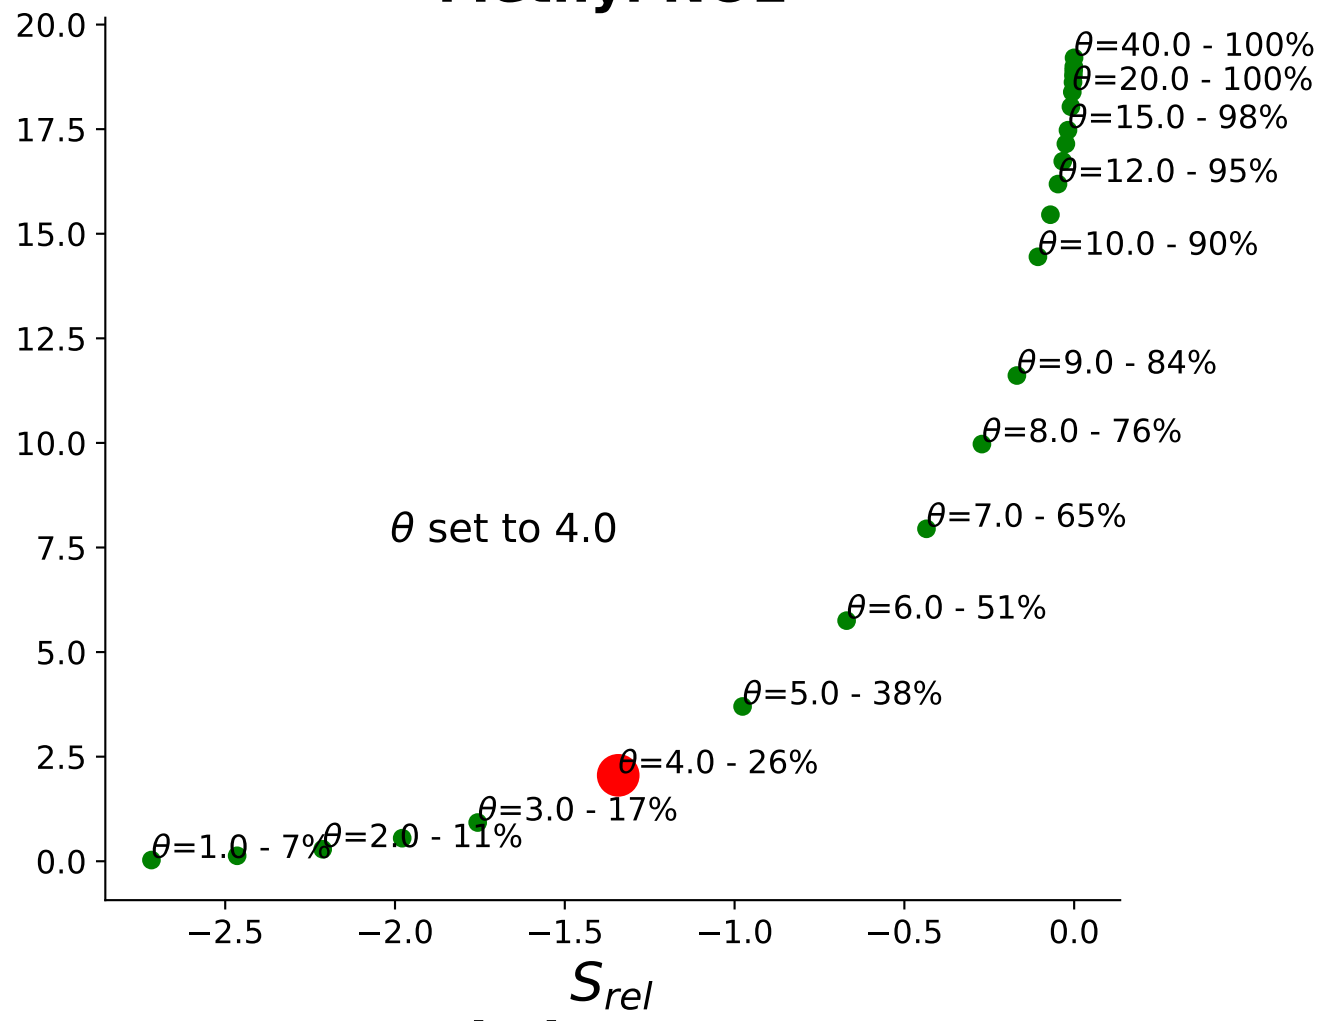

HN2 NOE

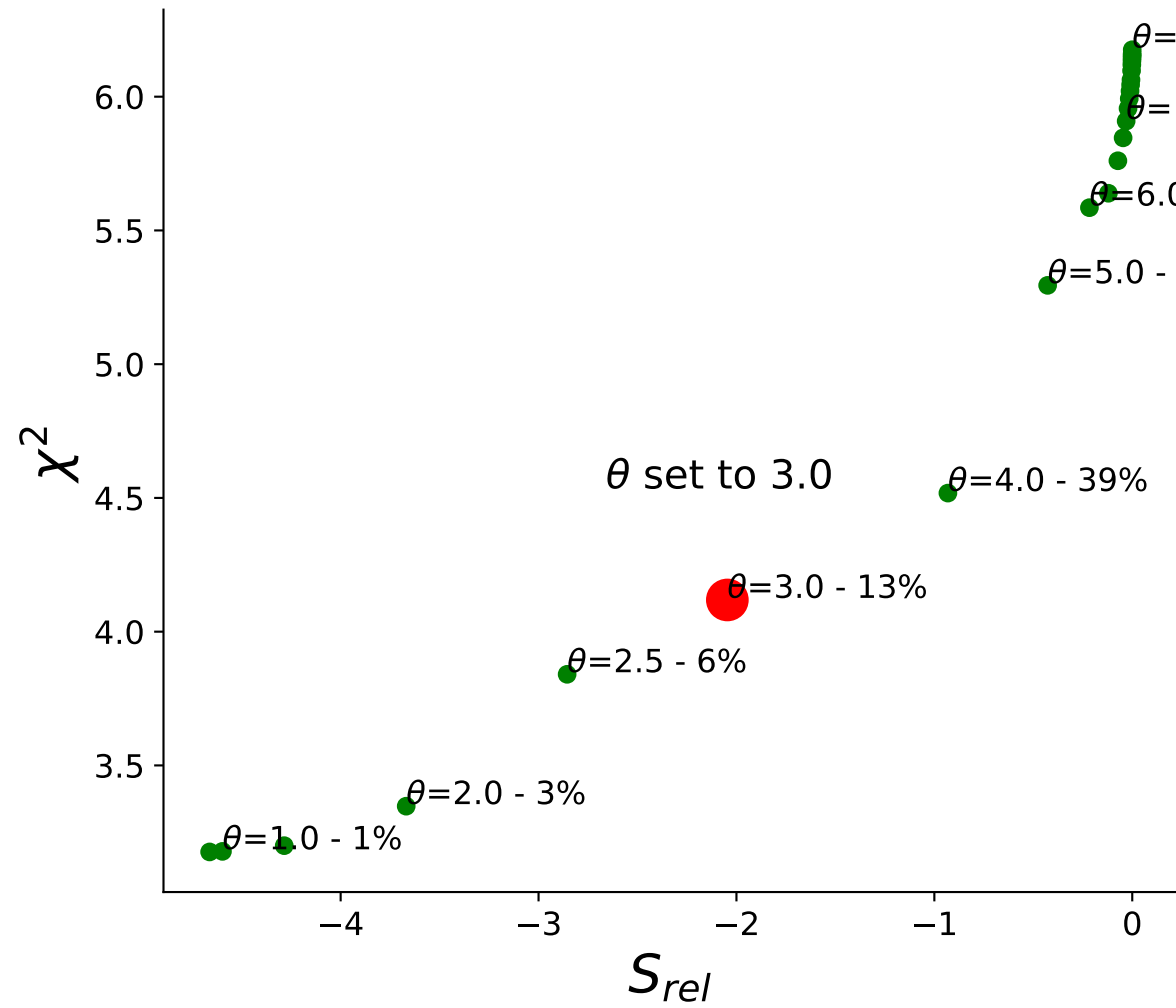

Methyl, HN2 NOE

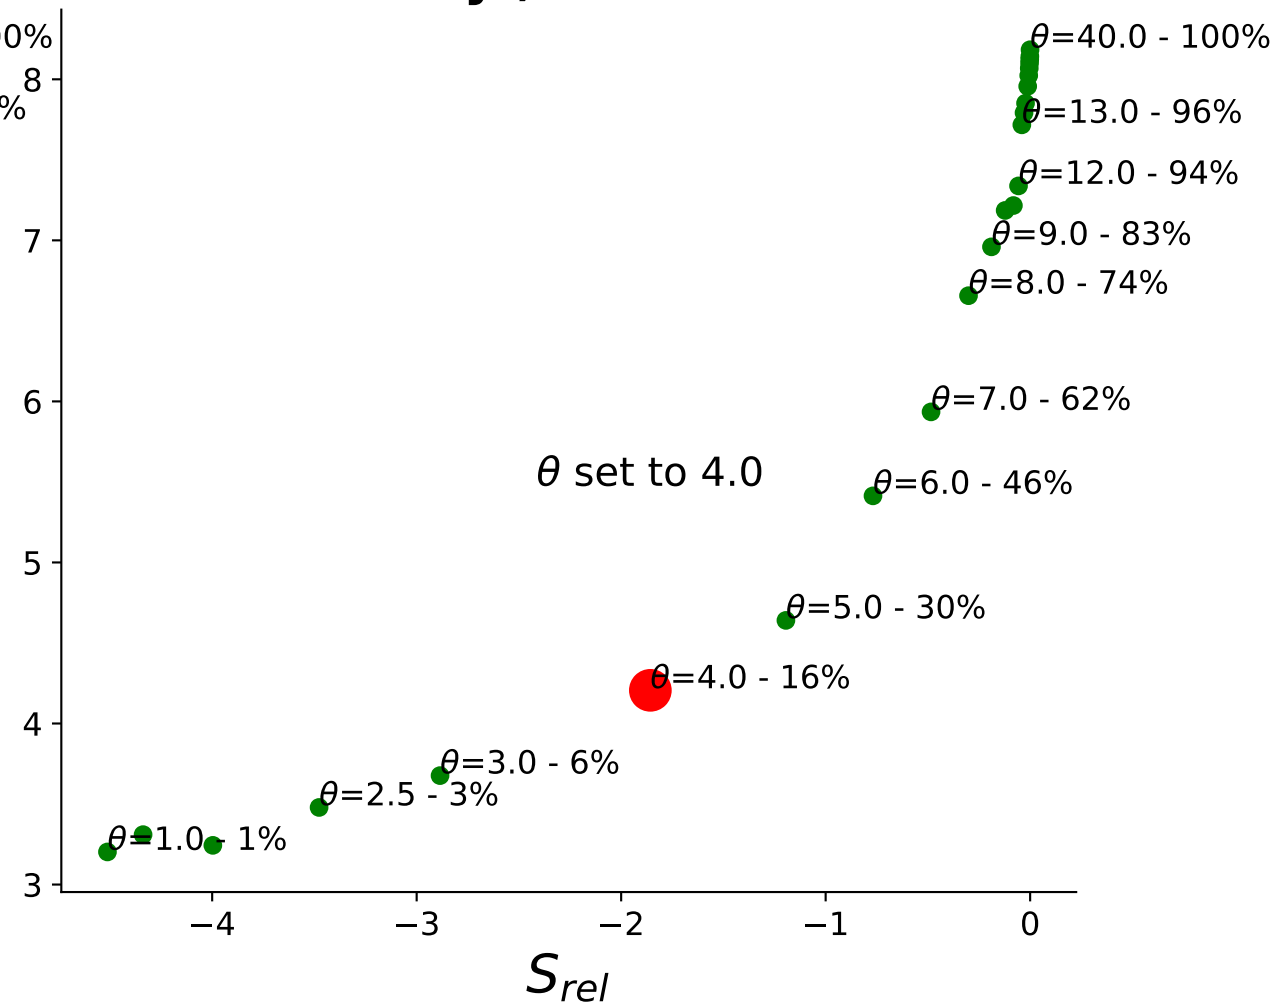

SAXS, Methyl NOE

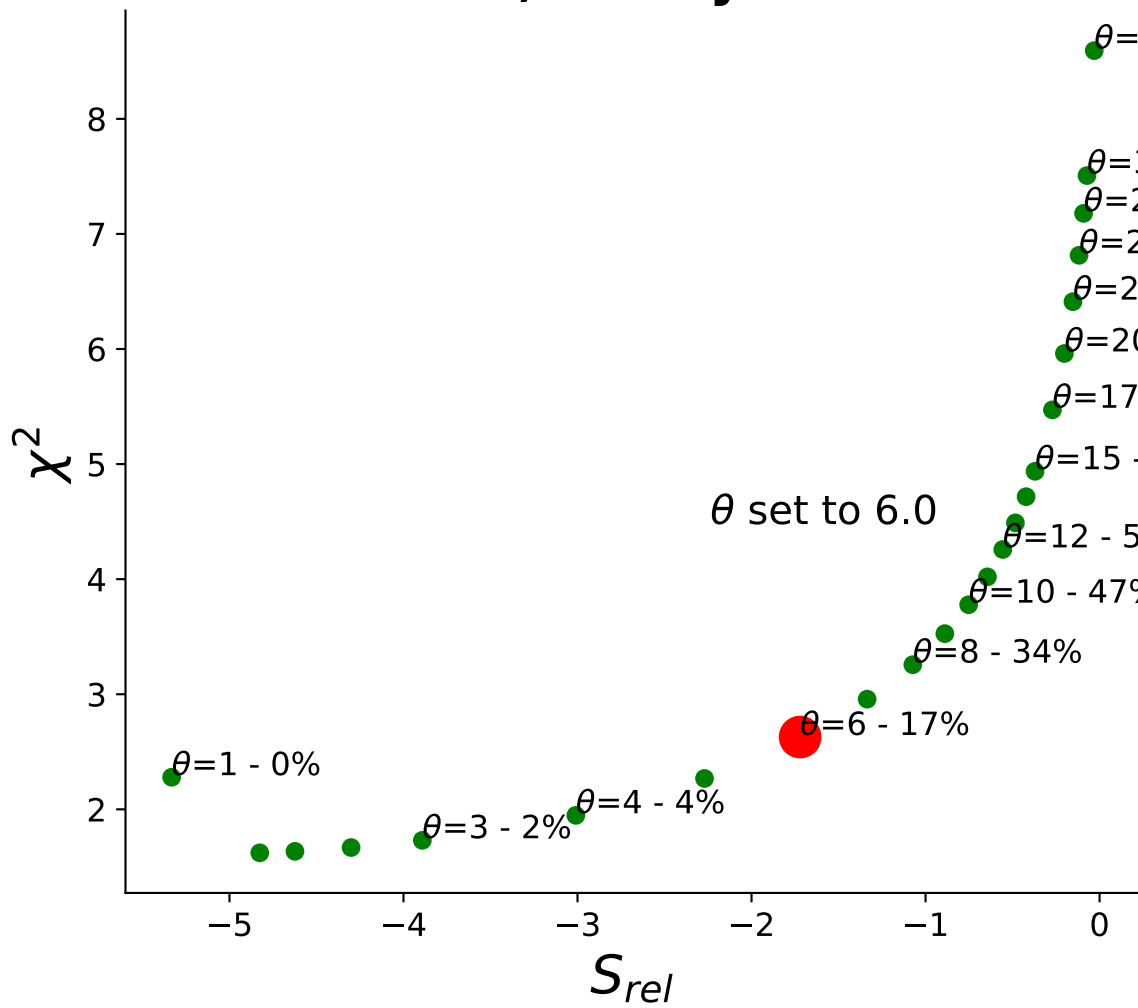

SAXS, HN2 NOE

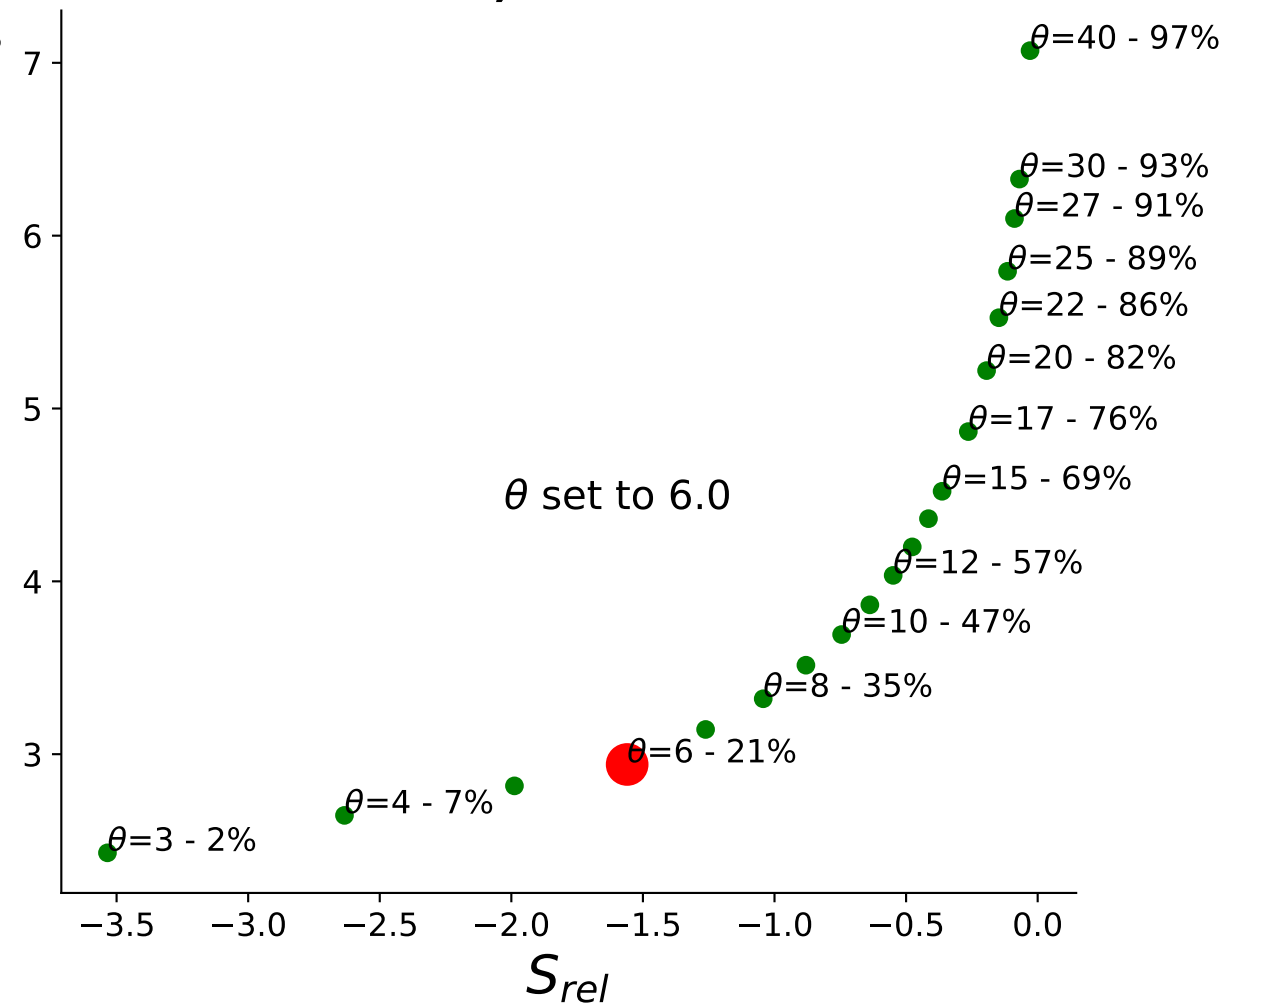

SAXS, Methyl, HN2 NOE

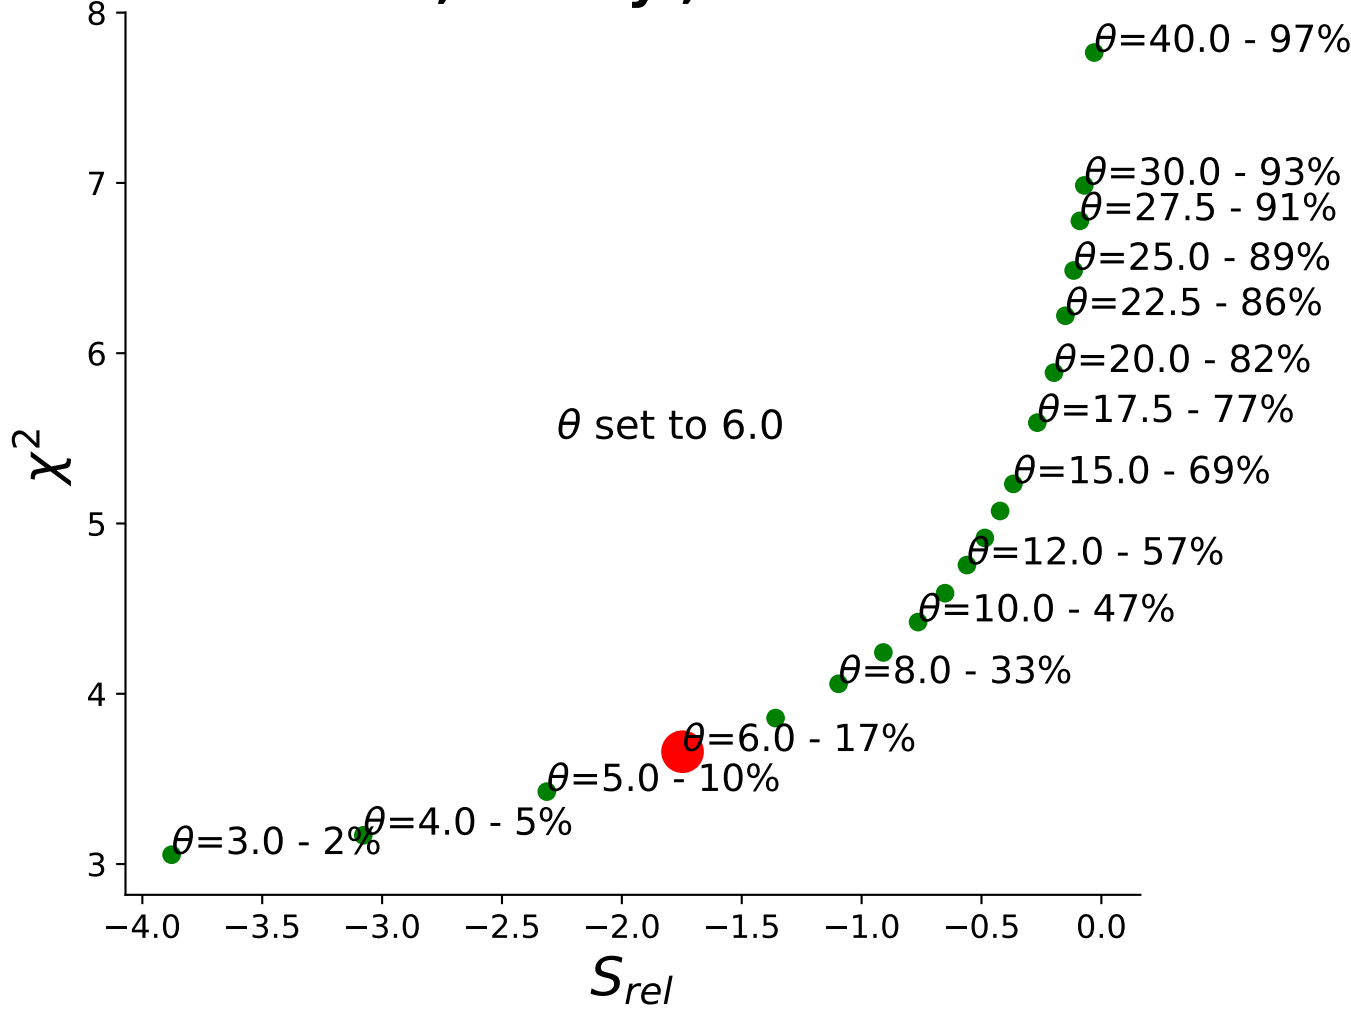

Supplement: supp [file elife_poa_e56518_Figure_3_figure_supplement_3.pdf › elife_poa_e56518_Figure_3_figure_supplement_3.pdf]
